# Supplementary material for: Evaluation of the Association between Gestational Diabetes Mellitus at First Pregnancy and Cancer within 10 Years Postpartum Using National Health Insurance Data in South Korea
Source: PubMed Central journal article supplement (PMC6313396; doi:10.3390/ijerph15122646), 2018-11-26
Supplement: ijerph-15-02646-s001.pdf [file ijerph-15-02646-s001.pdf]

# Evaluation of the Association between Gestational Diabetes Mellitus at First Pregnancy and Cancer within 10 Years Postpartum Using National Health Insurance Data in South Korea

Kyu-Tae Han <sup>1</sup>, Geum Joon Cho <sup>2</sup> and Eui Hyeok Kim <sup>3,\*</sup>

Supplementary

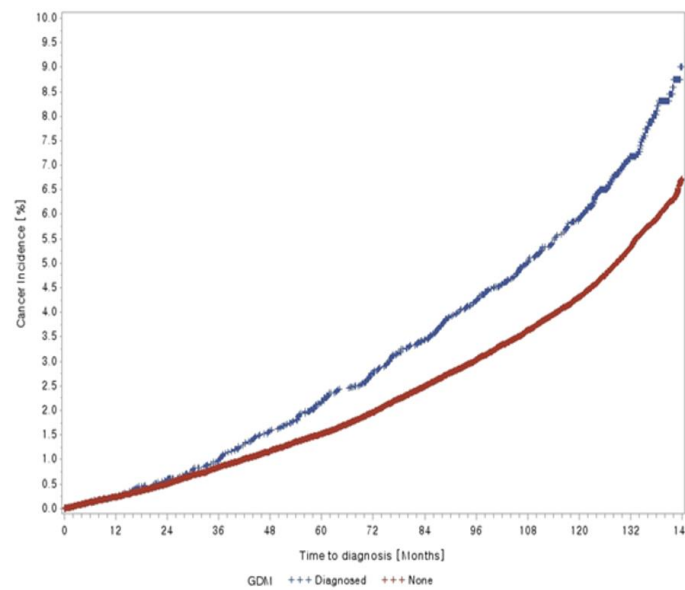

Figure S1. Kaplan-Meier Curves for incidence of total cancer by GDM. † *p*-value Log-rank test < 0.0001.

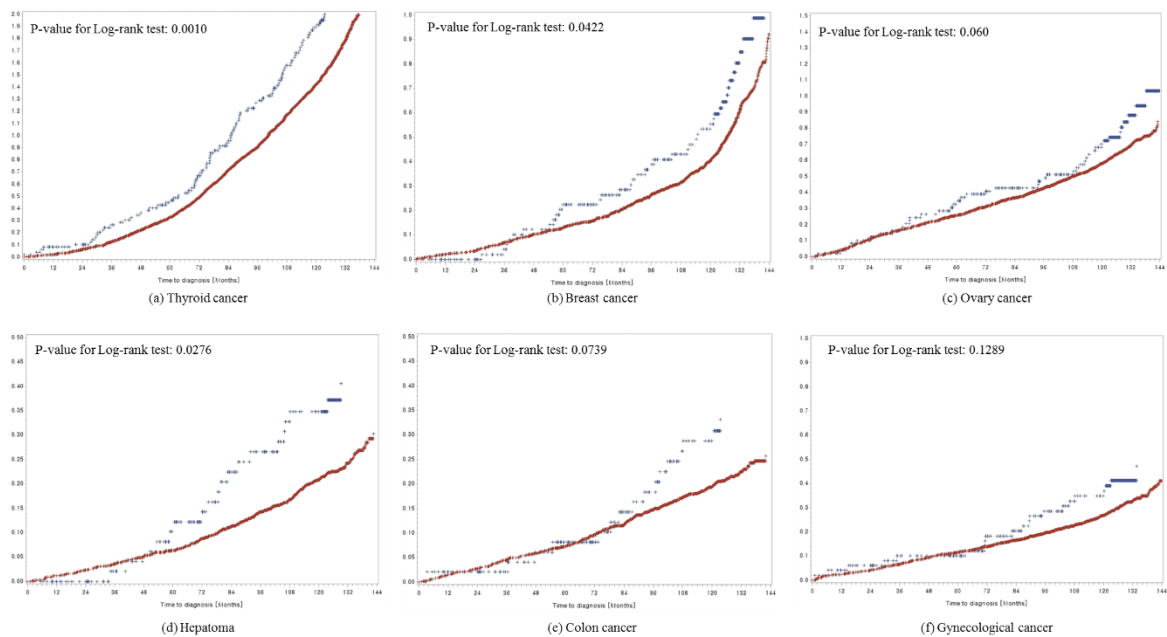

Figure S2. Kaplan-Meier Curves for each cancer by GDM.
